# Supplementary material for: Polybenzoxazine-based nitrogen-containing porous carbons for high-performance supercapacitor electrodes and carbon dioxide capture
Source: Royal Society of Chemistry journal article supplement (doi:10.1039/c4ra13637c), 2014-12-11
Supplement: c4ra13637c1.pdf [file c4ra13637c1.pdf]

## Electronic Supplementary Information

### **Polybenzoxazine-based nitrogen-containing porous carbons for high-performance supercapacitor electrode and carbon dioxide capture**

Liu Wan,<sup>a,b</sup> Jianlong Wang,<sup>a</sup> Yahui Sun,<sup>a,b</sup> Chong Feng<sup>a,b</sup> and Kaixi Li<sup>a\*</sup>

<sup>a</sup> *Institute of Coal Chemistry, Chinese Academy of Sciences, Taiyuan 030001, P. R. China. E-mail: likx@sxicc.ac.cAddress, Address, Town, Country.*

<sup>b</sup> *Graduate University of Chinese Academy of Sciences, Beijing 100049, P. R. China.*

## **Contents**

**Table S1.** Elemental and XPS analysis of the NPCs.

**Table S2.** XPS peak positions and content of each nitrogen, oxygen component.

**Table S3.** Comparison of the capacitive performance of some nitrogen-enriched porous carbon electrodes in 6 M KOH in the literature.

**Table S4.** Comparison of CO<sub>2</sub> capture performance of NPC-1 and some nitrogen-containing porous carbons as CO<sub>2</sub> adsorbents at 1 bar and 25°C.

**Table S1.** Elemental and XPS analysis of the NPCs.

| Sample | Elemental analysis (wt. %) |      |      |       | XPS analysis (at. %) |      |       |
|--------|----------------------------|------|------|-------|----------------------|------|-------|
|        | C                          | H    | N    | O     | C                    | N    | O     |
| NPC-c  | 79.10                      | 2.42 | 5.47 | 13.31 | 83.14                | 5.03 | 11.83 |
| NPC-0  | 78.49                      | 2.53 | 4.76 | 14.22 | 81.78                | 4.22 | 14.00 |
| NPC-1  | 78.21                      | 2.61 | 5.32 | 13.86 | 82.42                | 4.86 | 12.72 |
| NPC-2  | 82.73                      | 1.82 | 4.21 | 11.24 | 84.98                | 3.91 | 11.11 |
| NPC-3  | 86.44                      | 1.07 | 2.33 | 10.16 | 87.55                | 2.19 | 10.26 |

**Table S2.** XPS peak positions and content of each nitrogen, oxygen component.

| Element | Binding energy<br>(eV)   | Content (at. %) |       |       |       |       |
|---------|--------------------------|-----------------|-------|-------|-------|-------|
|         |                          | NPC-c           | NPC-0 | NPC-1 | NPC-2 | NPC-3 |
| N       | 398.5 (N-6)              | 1.72            | 1.12  | 1.16  | 0.90  | 0.47  |
|         | 400.2 (N-5)              | 2.65            | 2.49  | 3.02  | 2.10  | 1.14  |
|         | 401.0 (N-Q)              | 0.51            | 0.38  | 0.55  | 0.76  | 0.51  |
|         | 403.0 (N-X)              | 0.15            | 0.23  | 0.12  | 0.15  | 0.072 |
|         | Total content            | 5.03            | 4.22  | 4.86  | 3.91  | 2.19  |
| O       | 531.1 (Quinone)          | 3.19            | 4.61  | 3.22  | 2.23  | 1.65  |
|         | 532.3 (C=O)              | 5.22            | 6.21  | 5.81  | 5.58  | 5.00  |
|         | 533.3 (C-O)              | 2.58            | 2.62  | 2.91  | 2.57  | 3.26  |
|         | 534.2 (C-OH)             | 0.74            | 0.49  | 0.69  | 0.68  | 0.32  |
|         | 535.9 (H <sub>2</sub> O) | 0.11            | 0.076 | 0.091 | 0.053 | 0.022 |
|         | Total content            | 11.83           | 14.00 | 12.72 | 11.11 | 10.26 |

**Table S3.** Comparison of the capacitive performance of some nitrogen-enriched porous carbon electrodes in 6 M KOH in the literature.

| Item                                                          | $S_{BET}$<br>( $\text{m}^2 \text{g}^{-1}$ ) | $N$<br>(wt. %) | $C_g$<br>( $\text{F g}^{-1}$ ) | $C_g/S_{BET}$<br>( $\mu\text{F cm}^{-2}$ ) | Current<br>density ( $\text{A g}^{-1}$ ) | Ref       |
|---------------------------------------------------------------|---------------------------------------------|----------------|--------------------------------|--------------------------------------------|------------------------------------------|-----------|
| Nitrogen-doped ordered mesoporous carbon                      | 537                                         | 13.10          | 227                            | 42.3                                       | 0.2                                      | 1         |
| Nitrogen-doped graphitic carbon nanocages                     | 1001                                        | -              | 248                            | 24.8                                       | 1.0                                      | 2         |
| Nitrogen-doped porous nanofibers                              | 562.51                                      | 7.22           | 202                            | 35.9                                       | 1.0                                      | 3         |
| Nitrogen-enriched carbon nanowires                            | 641                                         | 7.04           | 327                            | 51.0                                       | 0.1                                      | 4         |
| Nitrogen-containing hydrothermal carbon                       | 571                                         | 4.4            | 220                            | 38.5                                       | 0.1                                      | 5         |
| Hierarchical nitrogen-doped porous carbon                     | 2149.9                                      | 2.04           | 198                            | 9.2                                        | 1.0                                      | 6         |
| Nitrogen-doped porous graphitic carbon                        | 1027                                        | 7.72           | 293                            | 28.5                                       | 1.0                                      | 7         |
| Nitrogen-rich “brick-and-mortar” carbon                       | 957                                         | 6.6            | 361                            | 37.7                                       | 0.5                                      | 8         |
| Poly(benzoxazine-co-resol)-based hierarchically porous carbon | 376                                         | 0.53           | 247                            | 66                                         | 1.0                                      | 9         |
| NPC-2                                                         | 2036.3                                      | 4.21           | 362.4                          | 17.8                                       | 1.0                                      | This work |

**Table S4** Comparison of CO<sub>2</sub> capture performance of NPC-1 and some nitrogen-containing porous carbons as CO<sub>2</sub> adsorbents at 1 bar and 25°C.

| Adsorbents                                                         | S <sub>BET</sub><br>(m <sup>2</sup> g <sup>-1</sup> ) | N<br>(wt. %) | CO <sub>2</sub><br>uptake<br>(mmol g <sup>-1</sup> ) | CO <sub>2</sub> / N <sub>2</sub><br>selectivity<br>(25°C) | CO <sub>2</sub><br>adsorption<br>energy Q <sub>st</sub><br>(kJ mol <sup>-1</sup> ) | Referen<br>ce |
|--------------------------------------------------------------------|-------------------------------------------------------|--------------|------------------------------------------------------|-----------------------------------------------------------|------------------------------------------------------------------------------------|---------------|
| Microporous carbons from dialdehyde and diamine                    | 1881                                                  | 0.36         | 2.86                                                 | 47                                                        | 18-33                                                                              | 10            |
| N-doped zeolite Y templated carbon                                 | 1685                                                  | 4.0          | 2.36                                                 | -                                                         | 30-40                                                                              | 11            |
| Nitrogen enriched porous carbons from melamine-formaldehyde resins | 490                                                   | 0.32         | 2.25                                                 | -                                                         | -                                                                                  | 12            |
| Nitrogen-doped porous carbon monolith                              | 467                                                   | 1.92         | 3.1                                                  | 10.1                                                      | -                                                                                  | 13            |
| Chitosan derived nitrogen-doped microporous carbons                | 1381                                                  | 4.59         | 3.9                                                  | 21                                                        | 22.7-30.4                                                                          | 14            |
| N-doped carbon from polypyrrole                                    | 1700                                                  | 10.14        | 3.9                                                  | 5.3                                                       | 18.9-31.5                                                                          | 15            |
| N-doped porous carbon                                              | 1979                                                  | 4.32         | 4.30                                                 | 30                                                        | -                                                                                  | 16            |
| NPC-1 derived from polybenzoxazine                                 | 1254.9                                                | 5.32         | 3.95                                                 | 32.0                                                      | 19-51                                                                              | This work     |

Reference:

- 1 L. Wang and R. T. Yang, *J. Phys. Chem. C*, 2012, **116**, 1099-1106.
- 2 Y. Tan, C. Xu, G. Chen, Z. Liu, M. Ma, Q. Xie, N. Zheng and S. Yao, *ACS Appl. Mater. Interfaces*, 2013, **5**, 2241-2248.
- 3 L. F. Chen, X. D. Zhang, H. W. Liang, M. G. Kong, Q. F. Guan, P. Chen, Z. Y. Wu and S. H. Yu, *ACS nano* 2012, **6**, 7092-7102.
- 4 D. X. Yuan, T. X. Zhou, S. L. Zhou, W. J. Zou, S. S. Mo and N. N. Xia, *Electrochem. Commun.*, 2011, **13**, 242-246.
- 5 L. Zhao, L. Z. Fan, M. Q. Zhou, H. Guan, S. Y. Qiao, M. Antonietti and M. M. Titirici. *Adv. Mater.*, 2010, **22**, 5202-5206.
- 6 X. Hong, K. S. Hui, Z. Zeng, K. N. Hui, L. J. Zhang, M. Y. Mo and M. Li. *Electrochim. Acta*, 2014, **130**, 464-469.
- 7 L. Sun, C. Tian, Y. Fu, Y. Yang, J. Yin, L. Wang and H. Fu, *Chem. Eur. J.*, 2014, **20**, 564-574.

- 8 D. Yu, K. Goh, L. Wei, H. Wang, Q. Zhang, W. Jiang, R. Si and Y. Chen, *J. Mater. Chem. A*, 2013, **1**, 11061-11069.
- 9 D. C. Guo, J. Mi, G. P. Hao, W. Dong, G. Xiong, W. C. Li and A. H. Lu, *Energy Environ. Sci.*, 2013, **6**, 652-659.
- 10 J. C. Wang and Q. Liu, *Nanoscale* 2014, **6**, 4148-4156.
- 11 C. Pevida, T. C. Drage and C. E. Snape, *Carbon* 2008, **46**, 1464-1474.
- 12 G. P. Hao, W. C. Li, D. Qian and A. H., Lu, *Adv. Mater.* 2010, **22**, 853-857.
- 13 X. Q. Fan, L. X. Zhang, G. B. Zhang, Z. Shu and J. L. Shi, *Carbon* 2013, **61**, 423-430.
- 14 J. Zhou, W. Li, Z. Zhang, W. Xing and S. Zhuo. *RSC Adv.*, 2012, **2**, 161-167.
- 15 M. Sevilla, P. V. Vigon and A. B. Fuertes, *Adv. Funct. Mater.* 2011, **21**, 2781-2787.
- 16 X. Ma, M. Cao and C. Hu, *J. Mater. Chem. A*, 2013, **1**, 913-198.
